The Journal of  
**Neuropsychiatry**  
and Clinical Neurosciences

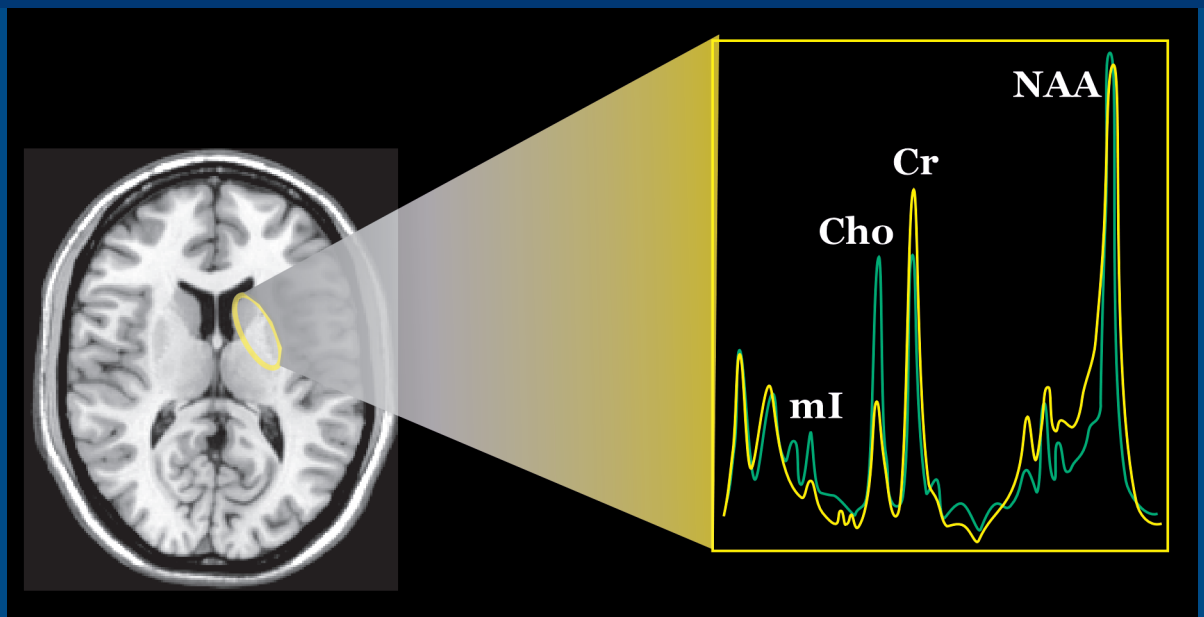

The Expanding Prominence of Toxic Leukoencephalopathy

Correlates and Prevalence of Aggression at Six Months  
and One Year After First-Time Traumatic Brain Injury

Intrathecal Thyroid Autoantibody Synthesis in a Subgroup  
of Patients With Schizophreniform Syndromes

Neuropsychiatric Associations With Gender, Illness Duration,  
Work Disability, and Motor Subtype in a U.S. Functional  
Neurological Disorders Clinic Population

Preliminary Evidence on Cannabis Effectiveness and  
Tolerability for Adults With Tourette Syndrome
