MEASURE  
EXECUTIVE FUNCTION  
**STRENGTHS &  
WEAKNESSES**  
IN ADULTS 18 & OLDER  
WITH THE NEW

 **CEFI Adult**™  
COMPREHENSIVE EXECUTIVE FUNCTION INVENTORY ADULT

Use the CEFI Adult with confidence and gain accurate results regardless of brain trauma, cognitive impairment, or Alzheimer's disease.

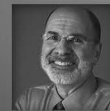

**Author Team**

**Jack A.  
Naglieri, Ph.D.**

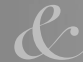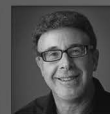

**Sam  
Goldstein, Ph.D.**

- Use the CEFI Adult's **nine comprehensive scales** to guide targeted intervention
- Interpreting results has never been simpler with our acclaimed **easy to read report options**
- Rely on **highly accurate results** based on extensive norming

**Special Offer!**

**FREE**

Sam Goldstein - Jack A. Naglieri  
Editors  
Handbook of  
**Executive  
Functioning**

Receive a **FREE** copy of Dr. Naglieri and Dr. Goldstein's "Handbook of Executive Functioning" (**\$90 value**) with purchase of any CEFI Adult Kit\*

*Available for a limited time while supplies last*

Go to [mhs.com/CEFIAdult](http://mhs.com/CEFIAdult) or contact your MHS consultant for more details

\*Some restrictions apply. Please see [mhs.com/cefiadult](http://mhs.com/cefiadult) for more details.

 **MHS**®  
ASSESSMENTS

[MHS.com/CEFIadult](http://MHS.com/CEFIadult)

# The Journal of Neuropsychiatry and Clinical Neurosciences

Official Journal of the American Neuropsychiatric Association

## Editorial Board

The *Journal of Neuropsychiatry and Clinical Neurosciences* (ISSN 0895-0172), is published quarterly by the American Psychiatric Association (APA), 1000 Wilson Blvd., Suite 1825, Arlington, VA 22209. Copyright © 2017 American Psychiatric Association. The *Journal of Neuropsychiatry and Clinical Neurosciences* is protected by copyright and may not be reproduced in any manner without written permission. The *Journal* is abstracted/indexed in *Chemical Abstracts*, *Current Contents/Clinical Medicine*®, *EMBASE/Excerpta Medica*, *Index Medicus/MEDLINE/MEDLARS*, *PsycINFO*, *Psychological Abstracts*, *Research Alert*®, and *Sci Search*®. It is available through University Microfilms, Inc., 300 North Zeeb Road, Ann Arbor, MI 48106, in microform, electronic, or paper format.

Manuscript submissions should no longer be sent by mail. Please visit <http://mc.manuscriptcentral.com> to upload a paper online.

U.S. individual subscriptions are \$270 per year for 4 issues (\$216 for APA members); international subscriptions are \$408 per year (\$243 for online only). APA International Members receive a 20% discount off the online only rate for an individual online subscription. Institutional subscriptions are tier priced. For institutional site license information and pricing, please email us at [appi@psych.org](mailto:appi@psych.org), call (800) 368-5777 or visit [www.appi.org/ForLibrarians/](http://www.appi.org/ForLibrarians/).

Advertising inquiries may be directed to Tim Wolfinger at PMI, 30 East 33rd St., New York, NY 10016; (212) 904-0379; [twolfinger@pminy.com](mailto:twolfinger@pminy.com).

APA is not responsible for statements made in this publication by contributors or advertisers. Unless stated, material in the *Journal of Neuropsychiatry and Clinical Neurosciences* does not reflect the endorsement, official attitude, or position of APA or the American Neuropsychiatric Association.

Periodicals postage paid at Arlington, VA, and additional mailing offices. POSTMASTER: Send address changes to the *Journal of Neuropsychiatry and Clinical Neurosciences*, 1000 Wilson Blvd., Suite 1825, Arlington, VA 22209.

### Editor

David B. Arciniegas, M.D.

### Editor Emeritus

Stuart C. Yudofsky, M.D.

### Deputy Editor

C. Alan Anderson, M.D.

### Assistant to the Editors

T. Angelita Garcia, M.B.A.

### Consulting Editors

C. Edward Coffey, M.D.  
Thomas W. McAllister, M.D.  
Henry Nasrallah, M.D.  
Fred Ovsiew, M.D.  
Jonathan M. Silver, M.D.

### Associate Editors

Sheldon Benjamin, M.D.  
Kevin J. Black, M.D.  
Nashaat N. Boutros, M.D.  
John J. Campbell, M.D.  
Miles Cunningham, M.D.  
Michael Ebert, M.D.  
Richard B. Ferrell, M.D.  
Laura A. Flashman, Ph.D.  
Yonas E. Geda, M.D.  
Daniel I. Kaufer, M.D.  
W. Curt LaFrance, M.D.  
Edward C. Lauterbach, M.D.  
Mario Mendez, M.D., Ph.D.  
Charles Nemeroff, M.D., Ph.D.  
Trevor R. P. Price, M.D.  
Robert G. Robinson, M.D.  
David A. Silbersweig, M.D.  
Robert Stern, Ph.D.  
Kaloyan S. Tanev, M.D.  
Paula T. Trzepacz, M.D.  
Hal S. Wortzel, M.D.

### Neuropsychiatry Classics Editor

Thomas C. Neylan, M.D.

### Book Review Editor

Michael Schrift, D.O., M.A.

### Windows to the Brain Editors

Robin A. Hurley, M.D.  
L. Anne Hayman, M.D.  
Katherine H. Taber, Ph.D.

### American Psychiatric Association Publishing

John McDuffie  
*Interim Publisher*  
Michael Roy  
*Editorial Director, Journals*  
Angela Moore  
*Editorial Manager*  
Susan Westrate  
*Production Manager, Journals*  
Heidi Koch  
*Editorial Support Services Manager*  
Patrick Hansard  
*Director of Marketing and Sales*

AMERICAN  
PSYCHIATRIC  
ASSOCIATION  
PUBLISHING

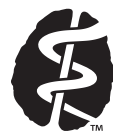

Please visit the Journal's website at [neuro.psychiatryonline.org](http://neuro.psychiatryonline.org)

# Subscribe today to the highest ranked mental health journal in the Health Policy & Services category!\*

## ▶ Don't miss the October issue:

- Understanding the costs of integrated care models from a CMHC perspective
- A survey of child psychiatrists on mental health crisis management for youths with autism spectrum disorder
- Aligning terminology to be in step with recovery-oriented mental health
- APA 2016–2017 Achievement Awards: outstanding programs

## ▶ Coming in the November issue:

- Using digital media advertising to encourage help seeking in early psychosis intervention
- A qualitative study of involuntary hospital admission experiences
- SOAR disability application outcomes among homeless adults
- MOMCare collaborative care for perinatal depression: costs and benefits

## ▶ One low price covers your print and online subscription.

\$ 115 APA Member print and online subscription

\$ 105 APA Member online-only subscription

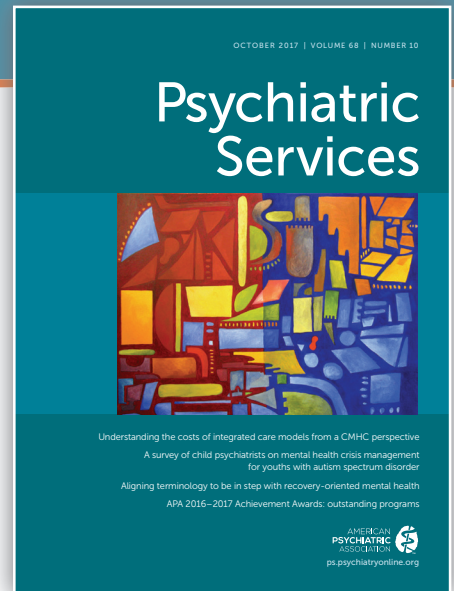

**PSYCHIATRIC  
SERVICES**  
FROM PAGES  
TO PRACTICE

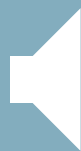

Listen to our podcast,  
***Psychiatric Services From Pages to Practice!***

[ps.psychiatryonline.org](http://ps.psychiatryonline.org)

**Subscribe today at [www.appi.org](http://www.appi.org) or call  
Customer Service at 1-800-368-5777.**

\*By its most recent Impact Factor (2.888), *Psychiatric Services* is the highest ranked mental health services journal in the Health Policy & Services Category of ISI's Journal Citation Reports. Of the 77 peer-reviewed journals included in the Health Policy & Services Category, *Psychiatric Services* ranks 8th.

AMERICAN  
PSYCHIATRIC  
ASSOCIATION  
**PUBLISHING**

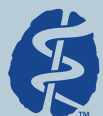

[www.appi.org](http://www.appi.org)

# The *Journal of Neuropsychiatry and Clinical Neurosciences* Announces New Article Types: **Submissions Welcome!**

JNCN has added several new article types to meet the needs of the field and stimulate commentary:

- **Treatment in Behavioral Neurology & Neuropsychiatry:** Using idealized clinical vignettes and high-level scholarship, these papers highlight issues in treatment that are frequently encountered but widely recognized as therapeutically, ethically, or administratively challenging.
- **Education in Behavioral Neurology & Neuropsychiatry:** Articles present, evaluate, and discuss educational methods, programs, and outcomes in neuropsychiatry education at the undergraduate medical, graduate medical, and/or postgraduate medical levels.
- **Analysis and Commentary:** Contributions present (a) focused analyses of and commentary on an article (or several related articles) on clinically important or controversial topics in neuropsychiatry that have been published recently in peer-reviewed clinical neuroscience journals (including, but not limited to, *JNCN*), with the aim of contextualizing, interpreting, or reconciling divergent findings, interpretations, and perspectives presented in those articles or (b) expert commentary on highly salient or controversial topics and articles in neuropsychiatry, where “expert” is defined by having published no fewer than five or more peer-reviewed articles that are directly relevant to the focus of the analysis and commentary.
- **Perspectives in Global Neuropsychiatry:** These articles offer insights into the practice of neuropsychiatry worldwide by describing the neuropsychiatric presentation, diagnosis, and treatment of a typical patient in a specific region or country and by highlighting the unique cultural, economic, political, and other issues that influence neuropsychiatric assessment and treatment in that country or region.
- **Icons in Neuropsychiatry:** This type of article offers historical or contemporary snapshots of neuropsychiatry’s practitioners or other images of interest (e.g., art, historic buildings, books, or monographs) to the journal’s readership and briefly describes their relevance to the field today.
- **Opinion:** These brief essays address important topics in neuropsychiatric practice, research, public health, health policy, health legislation, or ethics and generally are not commentaries on a specific article.
- **Introspections:** These works feature personal vignettes describing experiences in neuropsychiatric practice, research, education, and professional or community service that have been particularly important personally or professionally with the goal of informing the personal or professional development and experience of the Journal’s readers.

For information on submission requirements, visit the *Journal's*  
Information for Authors and Reviewers:

[http://neuro.psychiatryonline.org/neuro\\_authors\\_reviewers](http://neuro.psychiatryonline.org/neuro_authors_reviewers)
